# Urologia Internationalis

CONDIDIT: PETER A. NARATH (1955–1962)

HEINRICH HEUSSER, Basel

SECRETARIUS GENERALIS: GEORGES MAYOR, Zürich

## EDITORES

C. E. ALKEN, Homburg, Saar  
P. BISCHOFF, Hamburg  
H. BOEMINGHAUS, Düsseldorf  
E. BORS, Long Beach, Calif.  
K. BOSHAMER, Bad Dürkheim  
P. BRUNI, Napoli  
P. DEUTICKE, Wien  
J. D. FERGUSSON, London  
G. GIERTZ, Stockholm  
S. GIL VERNET, Barcelona  
W. E. GOODWIN, Los Angeles, Calif.  
W. GRÉGOIR, Bruxelles  
H. G. HANLEY, London  
F. HINMAN, Jr., San Francisco, Calif.  
A. R. KÜSS, Paris  
T. KUSUNOKI, Osaka

J. LANGE, Bordeaux  
W. F. LEADBETTER, Boston, Mass.  
E. LJUNGGREN, Göteborg  
F. MAY, München  
E. PÉREZ-CASTRO, Madrid  
A. PUIGVERT, Barcelona  
L. N. PYRAH, Leeds  
G. RAVASINI, Padova  
D. R. SMITH, San Francisco, Calif.  
H. TAKAYASU, Hongo  
R. UEBELHÖR, Wien  
A. VILLANUEVA, Mexico City  
W. F. WHITMORE, New York, N. Y.  
E. WILDBOLZ, Bern  
D. I. WILLIAMS, London

## REDACTORES

J. J. ALVAREZ IERENA, Mexico  
R. ANDERSEN, Oslo  
A. BABICS, Budapest  
J. BISQUERTT, T., Santiago  
TH. BURGHELE, Bucharest  
M. CAINE, Jerusalem  
A. CARNEIRO DE MOURA, Lisbon  
J. C. CHRISTOFFERSEN, Copenhagen  
L. CIFUENTES-DELATTE, Madrid  
P. J. DENNEHY, Johannesburg  
A. R. EL-SADR, Alexandria  
R. DE FREITAS, São Paulo  
H. U. GLOOR, Zürich  
I. H. GRIFFITHS, London  
H. HOUTAPPEL, Amsterdam  
F. A. HUGHES, Montevideo

L. LOPEZ, Caracas  
S. A. MAC DONALD, Montreal  
H. MARBERGER, Innsbruck  
R. I. MATHIS, Buenos Aires  
E. MICHALOWSKI, Krakow  
J. MOMBAERTS, Bruxelles  
H. MORTENSEN, Melbourne  
A. OBERHOLTZER, Rome  
O. OBRANT, Göteborg  
V. PAČES, Prague  
S. PETKOVIĆ, Belgrade  
A. PYTEL, Moscow  
L. QUÉNU, Paris  
F. TSUCHIYA, Tokyo  
R. D. TURNER, Los Angeles, Calif.

Downloaded from <http://karger.com/un/article-pdf/21/6/1/3581248/00279464.pdf> by guest on 04 August 2025

1966

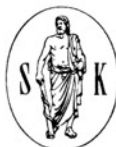

Vol. 21

BASEL (Switzerland)

S. KARGER

NEW YORK

# Index

|                                                                                                                                                                                                                                    |     |
|------------------------------------------------------------------------------------------------------------------------------------------------------------------------------------------------------------------------------------|-----|
| ADOLFSSON, G.: Regression of Hypernephroma . . . . .                                                                                                                                                                               | 365 |
| ALBESCU, I.: vide BURGHELE, TH.                                                                                                                                                                                                    |     |
| APOSTOL, N.: vide BURGHELE, TH.                                                                                                                                                                                                    |     |
| AUVERT, J.; CROSNIER, J. et VAYSSE, J.: Résultats des transplantations rénales . . . . .                                                                                                                                           | 386 |
| BALOGH, F.; PINTÉR, J.; SZELESTEI, T. and KARÁTSON, A.: The Effect of Mannitol in the Treatment of Patients with Chronic Uremia . . . . .                                                                                          | 28  |
| BALOGH, F.; PINTÉR, J. and KARÁTSON, A.: Experimental Data Concerning the Mode of Action of Mannitol . . . . .                                                                                                                     | 381 |
| BALOGH, F.: vide PINTÉR, J.                                                                                                                                                                                                        |     |
| BĂLTESCU, VAL.: vide BERARIU, T.                                                                                                                                                                                                   |     |
| BANDHAUER, K.: Immunreaktionen bei Fertilitätsstörungen des Mannes . . . . .                                                                                                                                                       | 247 |
| BAUMANN, U.: Blasenkomplikationen nach gynäkologischen Eingriffen im kleinen Becken . . . . .                                                                                                                                      | 444 |
| BECKER; BROSIG; FRICK; GÄRTNER; HASCEK; HOHENFELLNER; LOEBENSTEIN; MARBERGER; MAUERMAYER; MAYOR; MODELSKI; PEDROTTI; ROEHL; RUTISHAUSER; SIGEL; ÜBELHÖR: Das Prostatakarzinom: Symposium in Innsbruck, 17.-19. Juni 1965 . . . . . | 77  |
| BERARIU, T.; BĂLTESCU, VAL.; PROINOV, I. und CATANA, R.: Untersuchungen über Störungen des Mineralstoffwechsels bei Oxaluroolithiasis und deren Ausgleich . . . . .                                                                | 338 |
| BIEDA, J.: vide MICHALOWSKI, E.                                                                                                                                                                                                    |     |
| BOECKMANN, H. A.: Komplikationen bei der intravenösen Urographie . . . . .                                                                                                                                                         | 500 |
| BORS, E.: vide SHEY, H. H.                                                                                                                                                                                                         |     |
| BROSIG: vide BECKER                                                                                                                                                                                                                |     |
| BROSIG, W. und NAGEL, R.: Nierentransplantation . . . . .                                                                                                                                                                          | 97  |
| BUDÉLOVSKY, V.: vide PAČES, V.                                                                                                                                                                                                     |     |
| BURGHELE, TH.; APOSTOL, N. et ALBESCU, I.: Les modifications hormonales chez les tuberculeux uro-génitaux . . . . .                                                                                                                | 289 |
| CATANA, R.: vide BERARIU, T.                                                                                                                                                                                                       |     |
| COCKETT, A. T. K.: Urinary Reflux—The Physician's Dilemma . . . . .                                                                                                                                                                | 531 |
| CROSNIER, J.: vide AUVERT, J.                                                                                                                                                                                                      |     |
| CSELLÁR, M.: vide SZENDRÓI, Z.                                                                                                                                                                                                     |     |
| CSONTAI, A.: vide SZENDRÓI, Z.                                                                                                                                                                                                     |     |
| FARIS, T. D.: vide STARZL, TH. E.                                                                                                                                                                                                  |     |
| FEIT, J.: vide NÉMEC, M.                                                                                                                                                                                                           |     |
| FREITAG, G.: vide MÜLLER, G.-W.                                                                                                                                                                                                    |     |
| FRICK: vide BECKER                                                                                                                                                                                                                 |     |
| FRICK, J.: vide MARBERGER, H.                                                                                                                                                                                                      |     |
| GÄRTNER: vide BECKER                                                                                                                                                                                                               |     |
| GESCHE, B.: vide KOLLWITZ, A.-A.                                                                                                                                                                                                   |     |
| GRABER, P.; RUTISHAUSER, G. und WOLFF, G.: Experimentelle Untersuchungen über den Öffnungs- und Schließmechanismus der elektrisch stimulierten Blase . . . . .                                                                     | 182 |
| GRANT REID, R.: vide ROVINESCU, I.                                                                                                                                                                                                 |     |
| GREENBERG, S. R.: The Bilateral Effects Occurring in Hydronephrosis Produced Experimentally by Various Procedures . . . . .                                                                                                        | 1   |
| HASCEK: vide BECKER                                                                                                                                                                                                                |     |
| HELLINGER, J.: Die Behandlung schwerer Fibrinolyseblutungen nach Prostatektomie mit p-Aminomethylbenzoesäure . . . . .                                                                                                             | 61  |
| HOHENFELLNER: vide BECKER                                                                                                                                                                                                          |     |
| HOHENFELLNER, R.: vide MAY, P.                                                                                                                                                                                                     |     |
| HOHENFELLNER, R.; JANISCH, H. und MAY, P.: Zur Therapie gynäkologischer Harnleiter- und Blasenverletzungen . . . . .                                                                                                               | 452 |
| JAHNECKE, J.: vide SÖKELAND, J.                                                                                                                                                                                                    |     |
| JANISCH, H.: vide HOHENFELLNER, R.                                                                                                                                                                                                 |     |
| KARÁTSON, A.: vide BALOGH, F.                                                                                                                                                                                                      |     |
| KARÁTSON, A.: vide PINTÉR, J.                                                                                                                                                                                                      |     |
| KAUFMANN, J.: Impotentia generandi als Unfallfolge. Möglichkeiten und Grenzen ihrer Entschädigung in der gesetzlichen Unfallversicherung . . . . .                                                                                 | 239 |
| KLÍMOVÁ, M.: vide PAČES, V.                                                                                                                                                                                                        |     |

|                                                                                                                                                       |     |
|-------------------------------------------------------------------------------------------------------------------------------------------------------|-----|
| KOLLWITZ, A.-A. und GESCHE, B.: Harnveränderungen nach Gaben von Mineralquellen bei<br>gesunden Versuchspersonen . . . . .                            | 193 |
| KÖNIG, E.: vide MAY, P.                                                                                                                               |     |
| KÖNIG, K.: vide MAY, P.                                                                                                                               |     |
| KRIEK, H.: vide TRUNIGER, B.                                                                                                                          |     |
| KÜSS, R.: Une expérience d'homotransplantation rénale chez l'homme . . . . .                                                                          | 147 |
| LINDER, E.: Die Spenderwahl bei der Nierentransplantation . . . . .                                                                                   | 120 |
| LOEBENSTEIN: vide BECKER                                                                                                                              |     |
| MARBERGER: vide BECKER                                                                                                                                |     |
| MARBERGER, H. und FRICK, J.: Ergebnisse der Johanson-Plastik bei 258 Patienten mit Harn-<br>röhrenstenosen . . . . .                                  | 465 |
| MARCHIORO, TH. L.: vide STARZL, TH. E.                                                                                                                |     |
| MARIČIĆ, Ž.: vide NOVAK, R.                                                                                                                           |     |
| MAUERMAYER: vide BECKER                                                                                                                               |     |
| MAY, P.; HOHENFELLNER, R.; KÖNIG, E. und KÖNIG, K.: Diagnostik und Therapie der Prostata-<br>tuberkulose . . . . .                                    | 329 |
| MAY, P.: vide HOHENFELLNER, R.                                                                                                                        |     |
| MAYOR: vide BECKER                                                                                                                                    |     |
| MENYHÁRT, I.: vide SZENDRŐI, Z.                                                                                                                       |     |
| MICHAŁOWSKI, E.; MODELSKI, W. and BIEDA, J.: Removable Hemostatic Suture in Suprapubic<br>Prostatectomy . . . . .                                     | 549 |
| MODELSKI: vide BECKER                                                                                                                                 |     |
| MODELSKI, W.: vide MICHAŁOWSKI, E.                                                                                                                    |     |
| MULLER, G.-W.; FREITAG, G. und PAUL, G.: Zur Diagnostik und Klinik multipler doppelseitiger<br>Angiome der Nieren . . . . .                           | 18  |
| MULLER, J. H.: Complications vésicales éventuelles après Radiothérapie des cancers génitaux<br>de la femme . . . . .                                  | 437 |
| MUTAVDŽIĆ, M.: vide PETKOVIĆ, S.                                                                                                                      |     |
| NAGEL, R.: vide BROSIG, W.                                                                                                                            |     |
| NAGY, L.: vide SZENDRŐI, Z.                                                                                                                           |     |
| NÉMÉC, M.; ŠPANIHEL, J. und FEIT, J.: Einige Erkenntnisse über die Wirkung des weiblichen<br>Hormons bei Ratten . . . . .                             | 47  |
| NOVAK, R. und MARIČIĆ, Ž.: Persistenz der prostatistischen Loge nach der Prostatektomie als<br>Ursache postoperativer Schwierigkeiten . . . . .       | 68  |
| OKEN, D. E.: vide TRUNIGER, B.                                                                                                                        |     |
| PAČES, V. und BUDĚLOVSKÝ, V.: Bericht über den tschechoslowakischen urologischen Kongreß<br>mit internationaler Beteiligung . . . . .                 | 477 |
| PAČES, V. and KLÍMOVÁ, M.: Renal Changes after Direct Irradiation of the Kidney in Man                                                                | 511 |
| PAUL, G.: vide MULLER, G.-W.                                                                                                                          |     |
| PEDROTTI: vide BECKER                                                                                                                                 |     |
| PETKOVIĆ, S. et MUTAVDŽIĆ, M.: Les opérations conservatrices dans le traitement des tumeurs<br>du bassin . . . . .                                    | 520 |
| PINTÉR, J.; BALOGH, F.; KARÁTSÓN, A. and SZELESTEI, T.: Prevention of Acute Anuria with<br>Special Regard to the Administration of Mannitol . . . . . | 54  |
| PINTÉR, J.; BALOGH, F. and KARÁTSÓN, A.: Experimental Experiences in the Prevention of<br>Acute Renal Failure . . . . .                               | 375 |
| PINTÉR, J.: vide BALOGH, F.                                                                                                                           |     |
| PROINOV, I.: vide BERARIU, T.                                                                                                                         |     |
| PUPATO, F.: Die Blasenkomplikationen nach Bestrahlungen im Bereiche des kleinen Beckens                                                               | 393 |
| RAMSEIER, H.: Histokompatibilitätsmessung . . . . .                                                                                                   | 173 |
| ROEHL: vide BECKER                                                                                                                                    |     |
| ROSEN, S. M.: vide TRUNIGER, B.                                                                                                                       |     |
| ROSSIER, P. H.: Ethique médicale et Transplantation rénale . . . . .                                                                                  | 141 |
| ROVINESCU, I. and GRANT REID, R.: The Granulomatous Lesions of the Testicle and Epididymis                                                            | 564 |
| RUTISHAUSER: vide BECKER                                                                                                                              |     |
| RUTISHAUSER, G.: vide GRABER, P.                                                                                                                      |     |
| SACK, H.: vide STROHMENGER, P.                                                                                                                        |     |
| SCHMITTLIN, W.: Erfahrungen bei der Transplantation von Leichennieren . . . . .                                                                       | 131 |
| SCHMICH, H.: vide SOMMERKAMP, H.                                                                                                                      |     |

|                                                                                                                                                                                                                                                  |                        |
|--------------------------------------------------------------------------------------------------------------------------------------------------------------------------------------------------------------------------------------------------|------------------------|
| SCHMIDT, A. W.: vide SÖKELAND, J.                                                                                                                                                                                                                |                        |
| SENNING, Å.: Operative Technik der Nierentransplantation . . . . .                                                                                                                                                                               | 124                    |
| SHEY, H. H. and BORS, E.: Pseudopapillomata of the Lower Urinary Tract Complicating Spinal Cord Injuries . . . . .                                                                                                                               | 353                    |
| SIGEL: vide BECKER                                                                                                                                                                                                                               |                        |
| SÖKELAND, J.; SCHMIDT, A. W. und JAHNECKE, J.: Die hydrodynamischen Druckveränderungen bei Nierenbeckenspülungen im Tierexperiment . . . . .                                                                                                     | 36                     |
| SOMMERKAMP, H. und SCHMICH, H.: Vergleichende Untersuchungen über die renale Kontrastmittelausscheidung bei der Infusionsurographie . . . . .                                                                                                    | 489                    |
| ŠPANIHEL, J.: vide NĚMEC, M.                                                                                                                                                                                                                     |                        |
| STARZL, TH. E.; MARCHIORO, TH. L. and FARIS, T. D.: Renal Homotransplantation: 21 to 37 Months Later . . . . .                                                                                                                                   | 159                    |
| STRAUSS, INGRID: Die Behandlung der Nierentuberkulose mit Corticoiden . . . . .                                                                                                                                                                  | 307                    |
| STROHMENGER, P. und SACK, H.: Resorption radioaktiv markierter Substanzen aus Harnblase und isolierter Dünndarmschlinge . . . . .                                                                                                                | 538                    |
| SZELESTEI, T.: vide BALOGH, F.                                                                                                                                                                                                                   |                        |
| SZELESTEI, T.: vide PINTÉR, J.                                                                                                                                                                                                                   |                        |
| SZENDRŐI, Z.; NAGY, L.; CSONTAI, A.; MENYHÁRT, I. und CSELLÁR, M.: Die Wirkung gleichzeitiger ACTH-Belastung und Leberschädigung auf die Prostata im Tierversuch . . . . .                                                                       | 553                    |
| SZKODNY, A.: vide ZIELIŃSKI, J.                                                                                                                                                                                                                  |                        |
| TRUNIGER, B.; ROSEN, S. M.; KRIEK, H. und OKEN, D. E.: Die Rejektion der homotransplantierten Nieren . . . . .                                                                                                                                   | 163                    |
| ÜBELHÖR: vide BECKER                                                                                                                                                                                                                             |                        |
| VAYSSE, J.: vide AUVERT, J.                                                                                                                                                                                                                      |                        |
| WOLFF, G.: vide GRABER, P.                                                                                                                                                                                                                       |                        |
| YONG H. YANG: Renal Hyperplasia and Neoplasia in Rats Given Dimethylnitrosamine . . . . .                                                                                                                                                        | 229                    |
| ZIELIŃSKI, J. und SZKODNY, A.: Die Behandlung der posttraumatischen Harnröhrenstriktur . . . . .                                                                                                                                                 | 209                    |
| CONGRESSES – KONGRESSE – CONGRÈS . . . . .                                                                                                                                                                                                       | 90, 190, 283, 488, 574 |
| BOOK REVIEWS – BUCHBESPRECHUNGEN – LIVRES NOUVEAUX . . . . .                                                                                                                                                                                     | 93, 192, 284, 391, 577 |
| INDEX RERUM ad Vol. 21 . . . . .                                                                                                                                                                                                                 | 578                    |
| ENGLISH SUMMARIES 1, 18, 28, 36, 47, 54, 61, 68, 77, 97, 120, 124, 131, 147, 159, 163, 173, 182, 193, 209, 229, 239, 247, 289, 307, 329, 338, 353, 365, 375, 381, 386, 393, 437, 444, 452, 465, 477, 489, 500, 511, 520, 531, 538, 549, 553, 564 |                        |

Alle Rechte, insbesondere das der Übersetzung in fremde Sprachen, vorbehalten  
 Ohne ausdrückliche Genehmigung des Verlages ist es auch nicht gestattet, dieses Buch oder Teile  
 daraus auf photomechanischem Wege (Photokopie, Mikrokopie) zu vervielfältigen

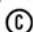

Copyright 1966 by S. Karger AG, Basel  
 Printed in Switzerland by Buchdruckerei Aargauer Tagblatt AG, Aarau  
 Clichés: Steiner & Cie AG, Basel
